# Supplementary material
Source: publisher figshare collection journal article supplement (https://frontiersin.figshare.com/ndownloader/files/24529313)
Supplement: Supplementary file [file 24529313]

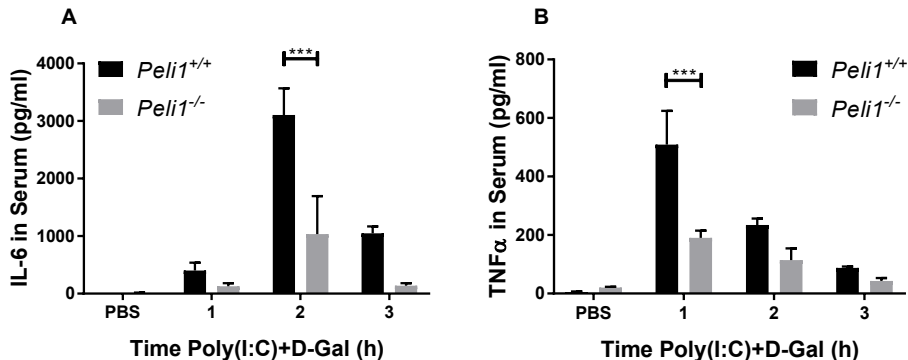

## Supplementary Figure S2: *Peli1* is required for the proinflammatory response to systemic TLR3 activation

*Peli1*<sup>-/-</sup> mice and age- and sex-matched wild type littermate controls were given a single dose of poly(I:C) (0.5 µg/g body weight) plus D-Galactosamine (0.7 mg/g body weight) or PBS (control) i.p. Animals were sacrificed and blood harvested at the time points indicated. Cytokine IL-6 (A) and TNFα (B) levels in venous blood were determined by CBA. Data shown are mean ± SEM; *Peli1*<sup>+/+</sup> mice PBS n=3, poly(I:C) 1 h n=3, poly(I:C) 2 h n=3, poly(I:C) 3 h n=3; *Peli1*<sup>-/-</sup> mice PBS n=3, poly(I:C) 1 h n=3, poly(I:C) 2 h n=3, poly(I:C) 3 h n=3. Significant differences between groups are indicated by \*\*\* p<0.001, as measured by two-way ANOVA with Sidak's post-test.
